# Supplementary material for: Global expression pattern of genes containing positively selected sites in European anchovy (Engraulis encrasicolus L.) may shed light on teleost reproduction
Source: PLoS One. 2023 Aug 11;18(8):e0289940. doi: 10.1371/journal.pone.0289940 (PMC10420382; doi:10.1371/journal.pone.0289940)
Supplement: S1 Table — (XLSX) [file pone.0289940.s001.xlsx]

## Sheet: Table S1
Table S1. Sequencing summary statistics of tissue-specific anchovy transcriptome.
Sample Name	Platform Used	Total Raw Reads	Total Raw Bases	Read Length (bp)	Total Clean Reads	Total Clean Bases	Q20 (%)	Q30 (%)	Summary
Ovary_Rep1_Forward	HiSeq 2000 (Illumina)	17075772	1878334920	101	14873144	1622482553	95.50	84.93	Total Raw Reads	1097756896
Ovary_Rep1_Reverse	HiSeq 2000 (Illumina)	17075772	1878334920	101	14873144	1622482553	98.01	91.39	Total Raw Bases	112512052176
Ovary_Rep2_Forward	HiSeq 2000 (Illumina)	18492806	2034208660	101	16872412	1843248052	96.52	87.92	Total Clean Reads	1002376596
Ovary_Rep2_Reverse	HiSeq 2000 (Illumina)	18492806	2034208660	101	16872412	1843248052	97.52	89.87	Total Clean Bases	102343035466
Ovary_Rep3_Forward	HiSeq 2000 (Illumina)	21486894	2363558340	101	19387717	2117407475	97.64	90.24
Ovary_Rep3_Reverse	HiSeq 2000 (Illumina)	21486894	2363558340	101	19387717	2117407475	96.23	87.03
Testis_Rep1_Forward	HiSeq 2000 (Illumina)	18744821	2061930310	101	16775024	1836191143	96.20	86.82
Testis_Rep1_Reverse	HiSeq 2000 (Illumina)	18744821	2061930310	101	16775024	1836191143	97.65	90.34
Testis_Rep2_Forward	HiSeq 2000 (Illumina)	20649877	2271486470	101	18596704	2035340835	97.45	89.64
Testis_Rep2_Reverse	HiSeq 2000 (Illumina)	20649877	2271486470	101	18596704	2035340835	96.33	87.15
Testis_Rep3_Forward	HiSeq 2000 (Illumina)	18751062	2062616820	101	16779864	1835137847	97.47	89.62
Testis_Rep3_Reverse	HiSeq 2000 (Illumina)	18751062	2062616820	101	16779864	1835137847	96.08	86.26
Cauda_Rep1_Forward	DNBSEQ-400 (MGI)	27166866	2716686600	100	26450463	2642643288	94.90	85.41
Cauda_Rep1_Reverse	DNBSEQ-400 (MGI)	27166866	2716686600	100	26450463	2642643288	92.42	80.53
Cauda_Rep2_Forward	DNBSEQ-400 (MGI)	29493668	2949366800	100	28723243	2869328902	95.02	86.04
Cauda_Rep2_Reverse	DNBSEQ-400 (MGI)	29493668	2949366800	100	28723243	2869328902	91.86	79.76
Cauda_Rep3_Forward	DNBSEQ-400 (MGI)	29474119	2947411900	100	28525147	2849677209	94.60	84.89
Cauda_Rep3_Reverse	DNBSEQ-400 (MGI)	29474119	2947411900	100	28525147	2849677209	91.66	79.16
Gill_Rep1_Forward	DNBSEQ-400 (MGI)	18275329	1827532900	100	17743996	1771115517	95.00	85.49
Gill_Rep1_Reverse	DNBSEQ-400 (MGI)	18275329	1827532900	100	17743996	1771115517	92.71	81.04
Gill_Rep2_Forward	DNBSEQ-400 (MGI)	18521673	1852167300	100	17861890	1783553390	94.95	85.12
Gill_Rep2_Reverse	DNBSEQ-400 (MGI)	18521673	1852167300	100	17861890	1783553390	92.54	80.20
Gill_Rep3_Forward	DNBSEQ-400 (MGI)	17972697	1797269700	100	17426568	1737551692	95.00	85.18
Gill_Rep3_Reverse	DNBSEQ-400 (MGI)	17972697	1797269700	100	17426568	1737551692	93.35	82.15
Fin_Rep1_Forward	DNBSEQ-400 (MGI)	21953341	2195334100	100	21316738	2128973457	95.45	86.69
Fin_Rep1_Reverse	DNBSEQ-400 (MGI)	21953341	2195334100	100	21316738	2128973457	92.66	81.31
Fin_Rep2_Forward	DNBSEQ-400 (MGI)	28905862	2890586200	100	27880307	2785889399	94.22	84.93
Fin_Rep2_Reverse	DNBSEQ-400 (MGI)	28905862	2890586200	100	27880307	2785889399	90.02	76.28
Fin_Rep3_Forward	DNBSEQ-400 (MGI)	25744693	2574469300	100	24815117	2479392267	94.39	84.85
Fin_Rep3_Reverse	DNBSEQ-400 (MGI)	25744693	2574469300	100	24815117	2479392267	90.70	77.21
Juvenile_Rep1_Forward	HiSeq 2000 (Illumina)	18839628	1902802428	101	16579548	1665956996	96.13	89.09
Juvenile_Rep1_Reverse	HiSeq 2000 (Illumina)	18839628	1902802428	101	16579548	1665956996	96.56	90.30
Juvenile_Rep2_Forward	HiSeq 2000 (Illumina)	18204481	1838652581	101	15956797	1606928151	96.51	90.14
Juvenile_Rep2_Reverse	HiSeq 2000 (Illumina)	18204481	1838652581	101	15956797	1606928151	96.03	88.80
Juvenile_Rep3_Forward	HiSeq 2000 (Illumina)	19805518	2000357318	101	17499786	1760508458	96.09	88.90
Juvenile_Rep3_Reverse	HiSeq 2000 (Illumina)	19805518	2000357318	101	17499786	1760508458	96.49	90.07
Juvenile_Rep4_Forward	HiSeq 2000 (Illumina)	20670606	2087731206	101	18133738	1825924129	96.09	88.99
Juvenile_Rep4_Reverse	HiSeq 2000 (Illumina)	20670606	2087731206	101	18133738	1825924129	96.54	90.23
Juvenile_Rep5_Forward	HiSeq 2000 (Illumina)	19421965	1961618465	101	16981913	1708909088	96.06	88.88
Juvenile_Rep5_Reverse	HiSeq 2000 (Illumina)	19421965	1961618465	101	16981913	1708909088	96.50	90.15
Muscle_Rep1_Forward	HiSeq 2000 (Illumina)	35125212	3547646412	101	30684532	3087297000	96.45	90.05
Muscle_Rep1_Reverse	HiSeq 2000 (Illumina)	35125212	3547646412	101	30684532	3087297000	96.08	88.96
Muscle_Rep2_Forward	HiSeq 2000 (Illumina)	40954980	4136452980	101	35421316	3564516559	96.49	90.09
Muscle_Rep2_Reverse	HiSeq 2000 (Illumina)	40954980	4136452980	101	35421316	3564516559	95.83	88.34
Liver_Rep1_Forward	HiSeq 2000 (Illumina)	15754735	1591228235	101	13680699	1377771358	95.75	88.07
Liver_Rep1_Reverse	HiSeq 2000 (Illumina)	15754735	1591228235	101	13680699	1377771358	96.40	89.67
Liver_Rep2_Forward	HiSeq 2000 (Illumina)	13944624	1408407024	101	12328658	1240534681	96.11	89.05
Liver_Rep2_Reverse	HiSeq 2000 (Illumina)	13944624	1408407024	101	12328658	1240534681	96.47	90.03
Kidney_Rep1_Forward	HiSeq 2000 (Illumina)	7845027	792347727	101	5674999	571079688	91.48	76.38
Kidney_Rep1_Reverse	HiSeq 2000 (Illumina)	7845027	792347727	101	5674999	571079688	93.82	83.10
Kidney_Rep2_Forward	HiSeq 2000 (Illumina)	5602192	565821392	101	4217978	424158599	93.82	83.14
Kidney_Rep2_Reverse	HiSeq 2000 (Illumina)	5602192	565821392	101	4217978	424158599	91.91	77.45
